# Supplementary material
Source: PubMed Central journal article supplement (PMC5827173)
Supplement: cmi20168x1.pdf [file cmi20168x1.pdf]

## SUPPLEMENTARY FILE

Cellular & Molecular Immunology (2016) 13, 1–7. doi:10.1038/cmi.2016.8; published online 1 1900

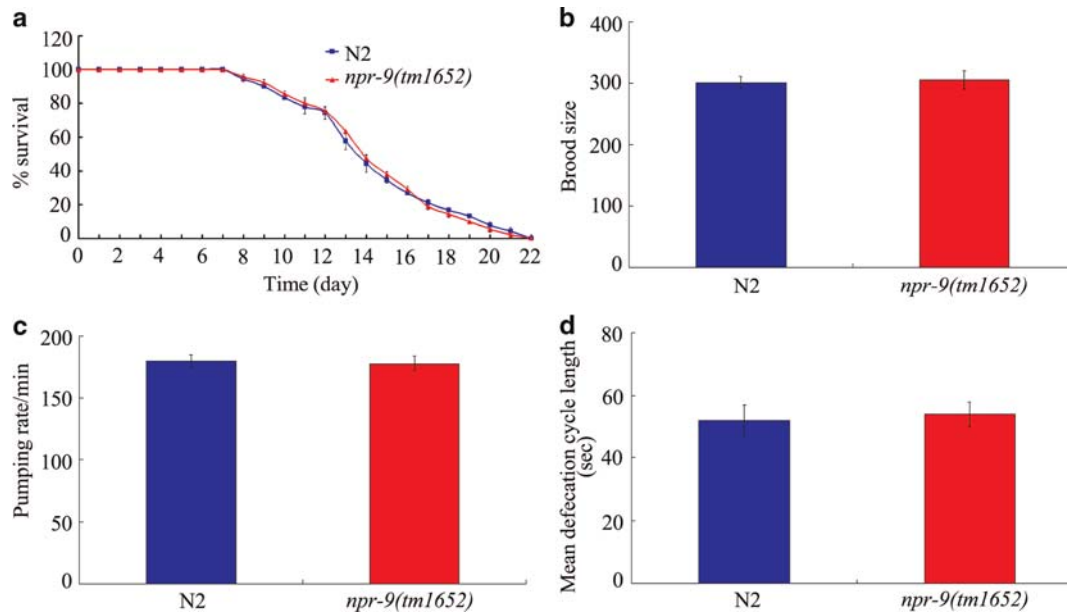

**Figure 1** Phenotypic analysis in *npr-9* mutant nematodes. (a) Lifespan comparison between wild-type and *npr-9* mutant nematodes. A statistical comparison of the survival plots indicates that survival of the mutant animals was not significantly different from the wild-type N2 strain ( $P=0.915$ ). (b) Brood size comparison between wild-type and *npr-9* mutant nematodes. (c) Pumping rate comparison between wild-type and *npr-9* mutant nematodes. (d) Mean defecation cycle length comparison between wild-type and *npr-9* mutant nematodes. Bars represent mean  $\pm$  SD.

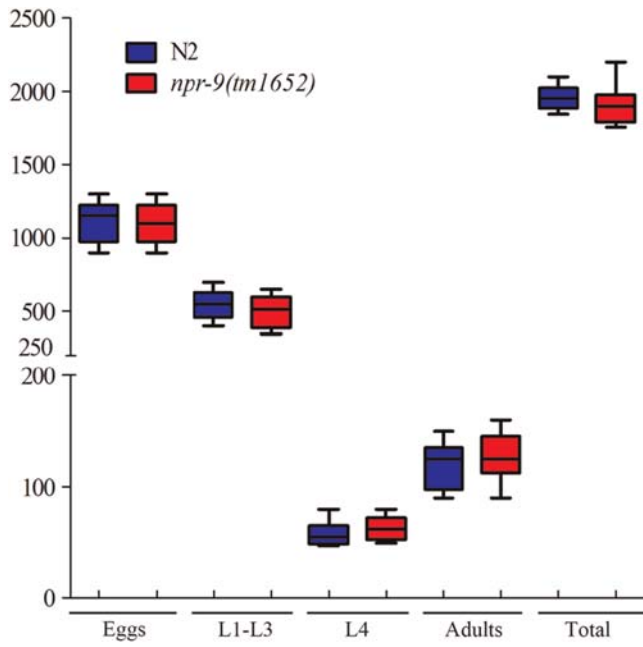

**Figure 2** Effect of *npr-9* mutation on population growth. Bars represent mean  $\pm$  SD.

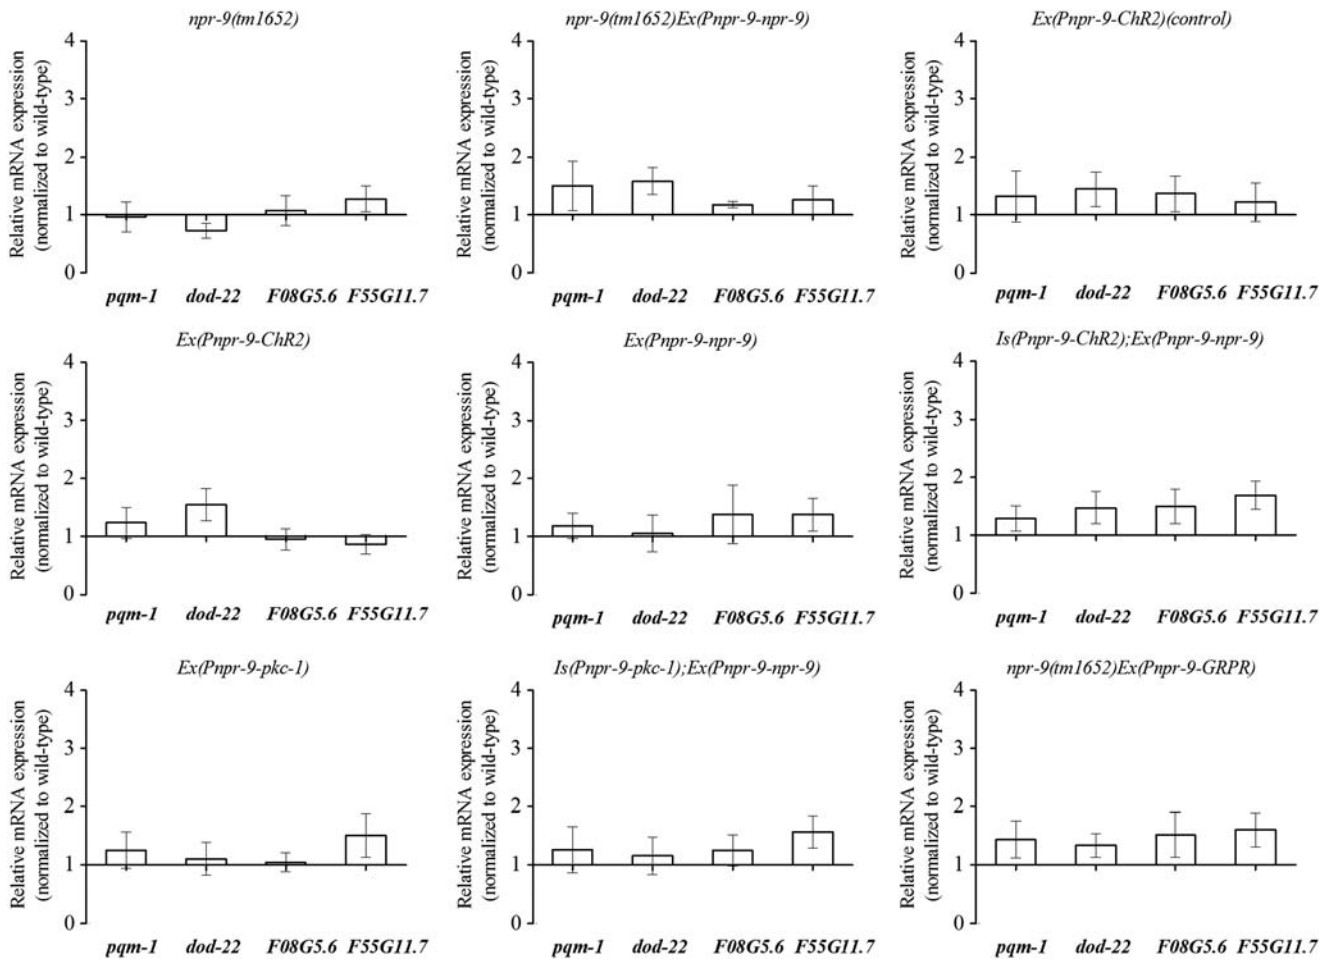

**Figure 3** Quantitative real-time PCR analysis of expression patterns of some immunity-related genes in nematodes on plates fed with OP50. Normalized expression is presented relative to wild-type expression. Bars represent mean  $\pm$  SD.

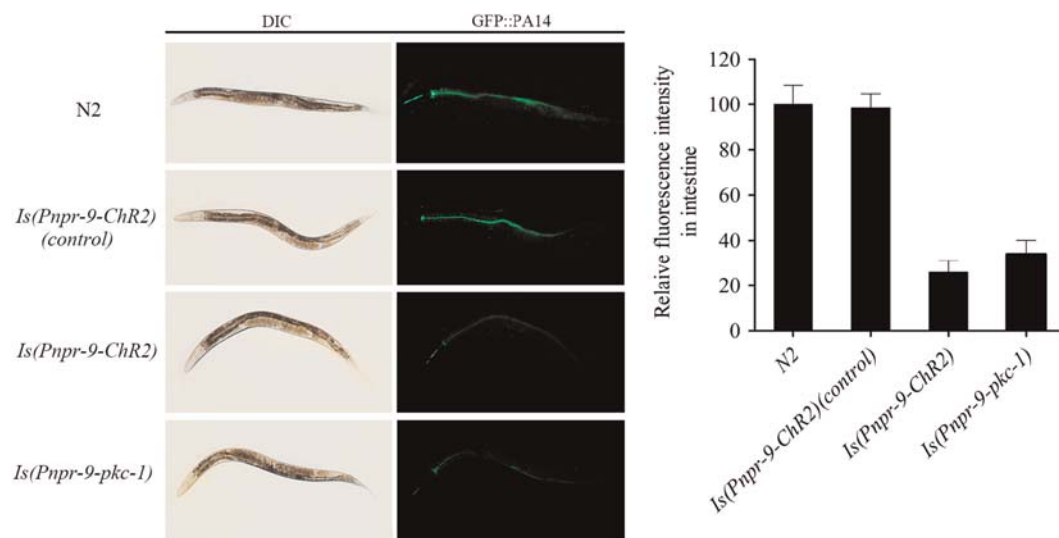

**Figure 4** Effects of *ChR2*-mediated activation of AIB interneurons or overexpression of *pkc-1* in AIB interneurons on PA14::GFP expression in intestine in nematodes. Bars represent mean  $\pm$  SD. \*\* $P < 0.01$  vs N2.

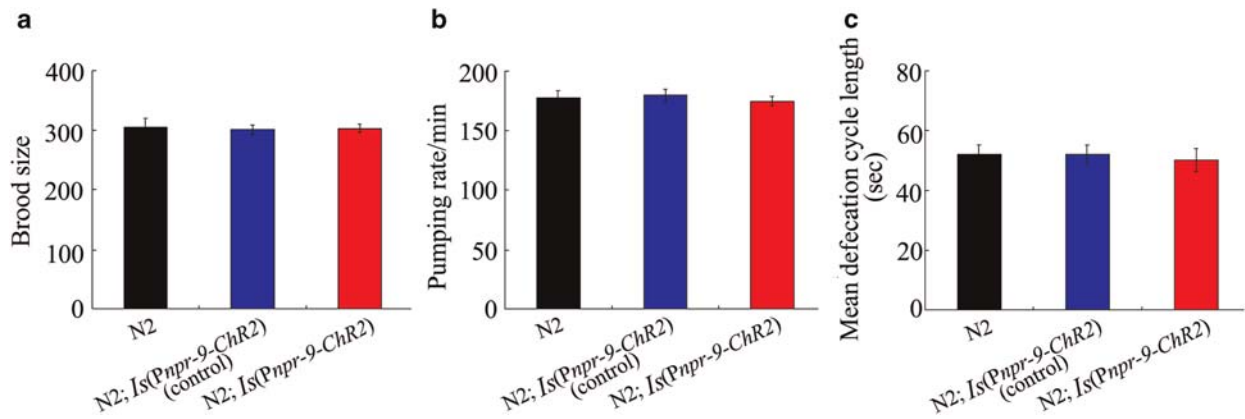

**Figure 5** Phenotypic analysis in nematodes with *ChR2*-mediated activation of AIB interneurons. (a) Brood size comparison between wild-type and nematodes with *ChR2*-mediated activation of AIB interneurons. (b) Pumping rate comparison between wild-type and nematodes with *ChR2*-mediated activation of AIB interneurons. (c) Mean defecation cycle length comparison between wild-type and nematodes with *ChR2*-mediated activation of AIB interneurons. Bars represent mean  $\pm$  SD.

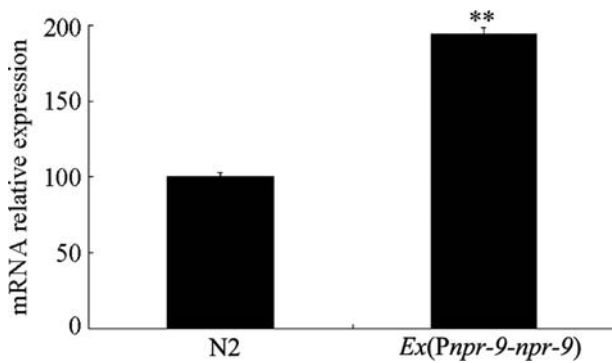

**Figure 6** *npr-9* expression in wild-type and nematodes overexpressing *npr-9*. Bars represent mean  $\pm$  SD. \*\* $P < 0.01$  vs N2.

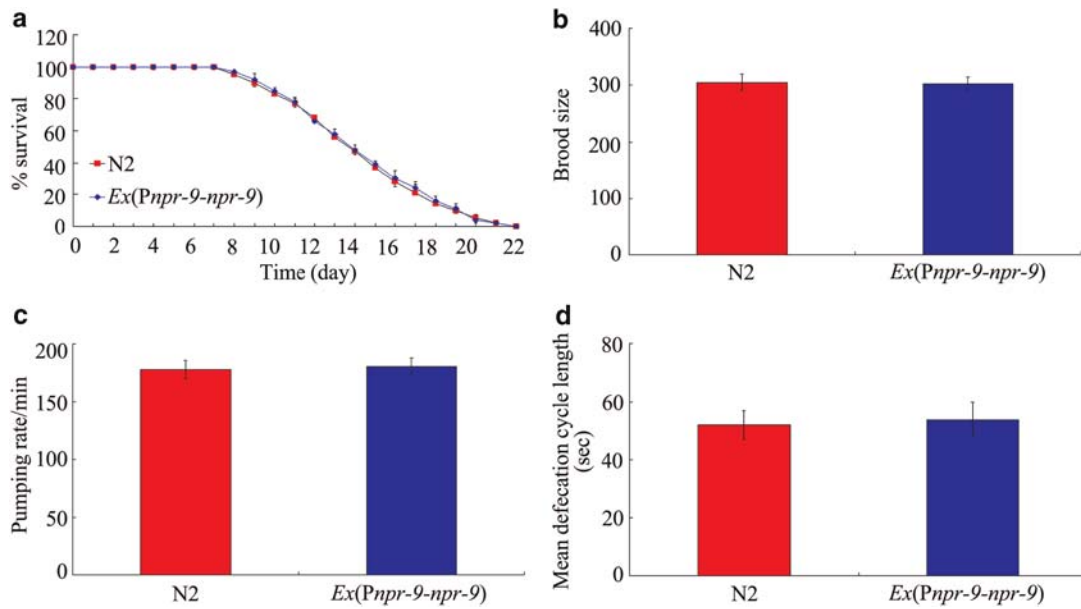

**Figure 7** Phenotypic analysis in nematodes overexpressing *npr-9* gene. (a) Lifespan comparison between wild-type and nematodes overexpressing *npr-9* gene. A statistical comparison of the survival plots indicates that survival of nematodes overexpressing *npr-9* gene was not significantly different from the wild-type N2 strain ( $P=0.936$ ). (b) Brood size comparison between wild-type and nematodes overexpressing *npr-9* gene. (c) Pumping rate comparison between wild-type and nematodes overexpressing *npr-9* gene. (d) Mean defecation cycle length comparison between wild-type and nematodes overexpressing *npr-9* gene. Bars represent mean  $\pm$  SD.

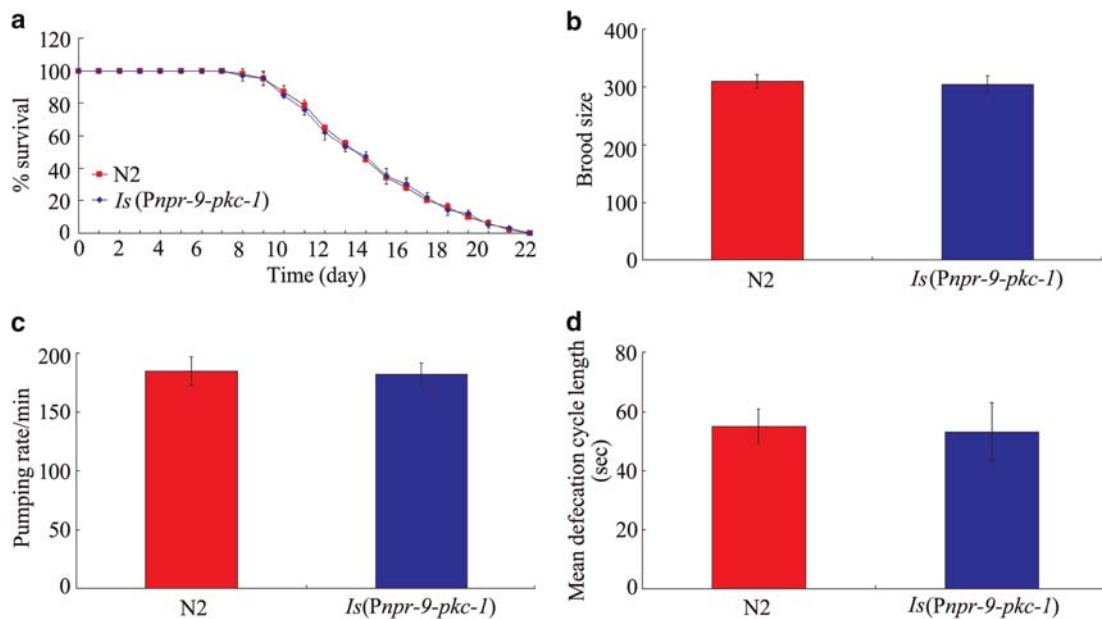

**Figure 8** Phenotypic analysis in nematodes overexpressing *pkc-1* gene in AIB interneurons. (a) Lifespan comparison between wild-type and nematodes overexpressing *pkc-1* gene in AIB interneurons. A statistical comparison of the survival plots indicates that survival of nematodes overexpressing *pkc-1* gene in AIB interneurons was not significantly different from the wild-type N2 strain ( $P=0.927$ ). (b) Brood size comparison between wild-type and nematodes overexpressing *pkc-1* gene in AIB interneurons. (c) Pumping rate comparison between wild-type and nematodes overexpressing *pkc-1* gene in AIB interneurons. (d) Mean defecation cycle length comparison between wild-type and nematodes overexpressing *pkc-1* gene in AIB interneurons. Bars represent mean  $\pm$  SD.

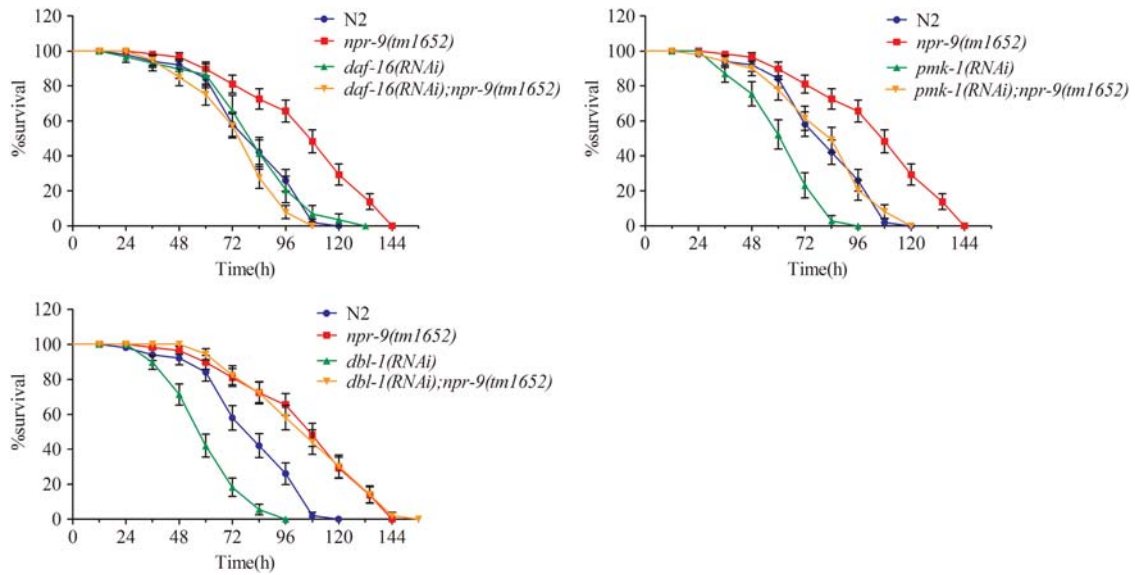

**Figure 9** Genetic interaction of *npr-9* with *daf-16*, *pmk-1*, or *dbl-1* in regulating innate immunity. A statistical comparison of the survival plots indicates that survival of *daf-16(RNAi);npr-9(tm1652)* or *pmk-1(RNAi);npr-9(tm1652)* was significantly different from that in *npr-9(tm1652)* ( $P < 0.0001$ ), whereas the survival plots indicates that the survival of *dbl-1(RNAi);npr-9(tm1652)* was not significantly different from that in *npr-9(tm1652)* ( $P = 0.9123$ ). Bars represent mean  $\pm$  SD.

**Table 1** Primers used for quantitative real-time polymerase chain reaction (PCR)

| Gene            | Forward primer (5'-3')           | Reverse primer (5'-3')      |
|-----------------|----------------------------------|-----------------------------|
| <i>tba-1</i>    | TCAACACTGCCATCGCCGCC             | TCCAAGCGAGACCAGGCTTCAG      |
| <i>lys-1</i>    | TTCGGATCTTTCAAGAAGGC             | TGGGATTCCAACAACGTAAA        |
| <i>lys-2</i>    | CCTTTCCAACAAATGTCCAAGTA          | GGTATCCTTGGCAGCTTGAT        |
| <i>pqm-1</i>    | TCAAATGCAACGTTCCCAAC             | CTCTGGAAGTGGAAATCCG         |
| <i>dod-22</i>   | CCAGGATACAGAATACGTACAAGACATTGCTC | CCAGAGATGACTTCAGTTTTCCGCCG  |
| <i>F08G5.6</i>  | ACTGCACTCAAATTCGGCTGGTGG         | GTTTCCATTCAATCCGTTTTCCAGAAC |
| <i>F55G11.7</i> | CACCCTCAGGCCAACTCAATC            | CTGTGACTGTAGCGTCACTTTCCATC  |
| <i>npr-9</i>    | TACGCTTTGATGTCGCAG               | CTGGATGTGCTGGAGTTT          |

**Table 2** Effects of *npr-9* expression in AIB interneurons on lifespan of *npr-9(tm1652)* mutants exposed to *P. aeruginosa* PA14

| Strain                    | Mean lifespan (h) | Significance (compared with WT) |
|---------------------------|-------------------|---------------------------------|
| WT                        | 69 $\pm$ 4        |                                 |
| <i>npr-9(tm1652)</i>      | 101 $\pm$ 3.6     | $P < 0.01$                      |
| <i>npr-9(tm1652)</i>      | 67 $\pm$ 2.5      | NS                              |
| <i>Ex(Pnpr-9-npr-9)#1</i> |                   |                                 |
| <i>npr-9(tm1652)</i>      | 69 $\pm$ 3.3      | NS                              |
| <i>Ex(Pnpr-9-npr-9)#2</i> |                   |                                 |

NS, no significance.

**Table 3** Effects of *npr-9* overexpression on lifespan of nematodes exposed to *P. aeruginosa* PA14

| Strain                    | Mean lifespan (h) | Significance (compared with WT) |
|---------------------------|-------------------|---------------------------------|
| WT                        | 69 $\pm$ 3.3      |                                 |
| <i>Ex(Pnpr-9-npr-9)#1</i> | 55 $\pm$ 4.6      | $P < 0.01$                      |
| <i>Ex(Pnpr-9-npr-9)#2</i> | 56 $\pm$ 3.5      | $P < 0.01$                      |

**Table 4** Effects of *npr-9* gene on lifespan of nematodes expressing *pkc-1* gene in AIB interneurons exposed to *P. aeruginosa* PA14

| Strain                                     | Mean lifespan (h) | Significance (compared with WT) |
|--------------------------------------------|-------------------|---------------------------------|
| WT                                         | 68 ± 3.4          |                                 |
| <i>Is(Pnpr-9-pkc-1)#1</i>                  | 102 ± 3.4         | <i>P</i> < 0.01                 |
| <i>Is(Pnpr-9-pkc-1)#2</i>                  | 105 ± 2.1         | <i>P</i> < 0.01                 |
| <i>Is(Pnpr-9-pkc-1);Ex(Pnpr-9-npr-9)#1</i> | 71 ± 3.1          | NS                              |
| <i>Is(Pnpr-9-pkc-1);Ex(Pnpr-9-npr-9)#2</i> | 69 ± 4.9          | NS                              |

NS, no significance.

**Table 5** Effects of expressing human *GRPR* on nematodes exposed to *P. aeruginosa* PA14

| Strain                                | Mean lifespan (h) | Significance (compared with WT) |
|---------------------------------------|-------------------|---------------------------------|
| WT                                    | 71 ± 2.5          |                                 |
| <i>npr-9(tm1652)</i>                  | 103 ± 4.6         | <i>P</i> < 0.01                 |
| <i>npr-9(tm1652)Ex(Pnpr-9-GRPR)#1</i> | 72 ± 2.5          | NS                              |
| <i>npr-9(tm1652)Ex(Pnpr-9-GRPR)#2</i> | 73 ± 2.7          | NS                              |

NS, no significance.
